# Supplementary material
Source: PubMed Central journal article supplement (PMC3434550)
Supplement: MCB.00539-12_zmb999109604so1.pdf [file MCB.00539-12_zmb999109604so1.pdf]

## SUPPLEMENTARY MATERIAL TO THE MANUSCRIPT ENTITLED

### ***Saccharomyces cerevisiae* ribosomal protein L26 is not essential for ribosome assembly and function**

Reyes Babiano <sup>1,3</sup>, Michael Gamalinda <sup>2,3</sup>, John L. Woolford Jr <sup>2,4</sup> and Jesús de la Cruz <sup>1,4</sup>

<sup>1</sup> Departamento de Genética, Universidad de Sevilla, Sevilla, Spain.

<sup>2</sup> Department of Biological Sciences, Carnegie Mellon University, Pittsburgh, PA, USA.

<sup>3</sup> These authors contributed contributed equally to this work

<sup>4</sup> Corresponding authors

#### **Plasmid constructions**

YCplac111-*RPL26A*; a PCR was performed using yeast genomic DNA as a template and the oligonucleotides RPL26A-LEFT and RPL26A-RIGHT (for the sequence of the oligonucleotides, see **Table S3**), placed plus-minus 1 kb upstream and downstream from the start-stop codon of the *RPL26A* ORF, respectively. The ca. 2.5 kb PCR product was cloned into pGEM®-T (Promega), then digested with *EcoRI* and cloned into YCplac111 (7), which was also digested with the same enzyme.

YCplac111-*RPL26B*; a PCR was performed using yeast genomic DNA as a template and the oligonucleotides RPL26B-LEFT and RPL26B-RIGHT (**Table S3**), placed plus-minus 1 kb upstream and downstream from the start-stop codon of the *RPL26B* ORF, respectively. The ca. 2.5 kb PCR product was cloned into pGEM®-T, then digested with *SphI* and *PstI* and cloned into YCplac111, which was also digested with the same enzymes.

YCplac111-*RPL26A-GFP*; a 1.8 kb PCR product containing the *RPL26A* ORF lacking the termination codon and an additional 1 kb upstream the ORF was obtained by PCR using the oligonucleotides RPL26A-LEFT and L26A-TAG (**Table S3**) and yeast genomic DNA as a template. This product was cloned into pGEM®-T Easy (Promega), then restricted with *SmaI* and *BamHI* and cloned into YCplac111-yeGFP (gift from M. N. Hall), which was also digested with the same enzymes. YCplac111-*RPL26A-eGFP* complemented the *rpI26* null mutant to the wild-type extent.

YCplac111-*RPL26B-GFP*; a 1.8 kb PCR product containing the *RPL26B* ORF lacking the termination codon and an additional 1 kb upstream the ORF was obtained by PCR using the oligonucleotides RPL26B-LEFTpHT $\Delta$  and L26B-TAG (**Table S3**) and yeast genomic DNA as a template. This product was cloned in pGEM<sup>®</sup>-T Easy, then restricted with *Sa*I and *Bam*HI and cloned into YCplac111-yeGFP, which was also digested with the same enzymes. YCplac111-*RPL26B-GFP* complemented the *rp126* null mutant to the wild-type extent.

The correctness of all resulting plasmids was confirmed by DNA sequencing.

**Table S1. Yeast strains used in this study**

| <b>Strain</b> | <b>Relevant genotype</b>                                                                                                                                                                                                                                   | <b>Reference</b> |
|---------------|------------------------------------------------------------------------------------------------------------------------------------------------------------------------------------------------------------------------------------------------------------|------------------|
| BY4743        | <i>MATa/MAT<math>\alpha</math> his3<math>\Delta</math>1/his3<math>\Delta</math>1 leu2<math>\Delta</math>0/leu2<math>\Delta</math>0 lys2<math>\Delta</math>0/LYS2<br/>met15<math>\Delta</math>0/MET15 ura3<math>\Delta</math>0/ura3<math>\Delta</math>0</i> | (2)              |
| BY4741        | <i>MATa his3<math>\Delta</math>1 leu2<math>\Delta</math>0 met15<math>\Delta</math>0 ura3<math>\Delta</math>0</i>                                                                                                                                           | (2)              |
| Y25253        | As BY4743 but <i>RPL26A::kanMX4/RPL26A</i>                                                                                                                                                                                                                 | Euroscarf        |
| Y24664        | As BY4743 but <i>RPL26B::kanMX4/RPL26B</i>                                                                                                                                                                                                                 | Euroscarf        |
| RBY272        | <i>MATa his3<math>\Delta</math>1 leu2<math>\Delta</math>0 lys2<math>\Delta</math>0 ura3<math>\Delta</math>0 RPL26A::kanMX4</i>                                                                                                                             | This work        |
| RBY273        | <i>MAT<math>\alpha</math> his3<math>\Delta</math>1 leu2<math>\Delta</math>0 ura3<math>\Delta</math>0 met15<math>\Delta</math>0 RPL26A::kanMX4</i>                                                                                                          | This work        |
| RBY274        | <i>MATa his3<math>\Delta</math>1 leu2<math>\Delta</math>0 ura3<math>\Delta</math>0 RPL26B::kanMX4</i>                                                                                                                                                      | This work        |
| RBY275        | <i>MAT<math>\alpha</math> his3<math>\Delta</math>1 leu2<math>\Delta</math>0 ura3<math>\Delta</math>0 met15<math>\Delta</math>0 RPL26B::kanMX4</i>                                                                                                          | This work        |
| RBY276        | <i>MATa his3<math>\Delta</math>1 leu2<math>\Delta</math>0 ura3<math>\Delta</math>0 RPL26A::kanMX4<br/>RPL26B::kanMX4</i>                                                                                                                                   | This work        |
| JWY6147       | <i>MATa ura3-52 trp1-1 lys2-801 his3-<math>\Delta</math>200 leu2-<math>\Delta</math>1</i>                                                                                                                                                                  | E. Jones         |
| JWY9626       | <i>MATa ura3-52 trp1-1 lys2-801 his3-<math>\Delta</math>200 leu2-<math>\Delta</math>1<br/>TRP1::GAL::3xHA-RPL26A RPL26B::kanMX6</i>                                                                                                                        | This work        |
| JWY9634       | <i>MATa ura3-52 trp1-1 lys2-801 his3-<math>\Delta</math>200 leu2-<math>\Delta</math>1<br/>TRP1::GAL::3xHA-RPL26A RPL26B::kanMX6 NOP7-<br/>TAP::URA3</i>                                                                                                    | This work        |
| JWY9663       | <i>MATa ura3-52 trp1-1 lys2-801 his3-<math>\Delta</math>200 leu2-<math>\Delta</math>1<br/>TRP1::GAL::3xHA-RPL26A RPL26B::kanMX6 NOP7-<br/>TAP::URA3 RPL35B-13xMYC::HIS3</i>                                                                                | This work        |
| JWY9691       | <i>MATa ura3-52 trp1-1 lys2-801 his3-<math>\Delta</math>200 leu2-<math>\Delta</math>1<br/>TRP1::GAL::3xHA-RPL26A RPL26B::kanMX6 NOP7-<br/>TAP::URA3 RPL37B-13xMYC::HIS3</i>                                                                                | This work        |

**Table S2. Plasmids used in this study**

| <b>Name</b>                         | <b>Relevant information</b>                      | <b>Reference</b> |
|-------------------------------------|--------------------------------------------------|------------------|
| YCplac33                            | <i>CEN URA3</i>                                  | (6)              |
| YCplac111                           | <i>CEN LEU2</i>                                  | (6)              |
| YCplac-111- <i>RPL26A</i>           | <i>RPL26A CEN LEU2</i>                           | This work        |
| YCplac-111- <i>RPL26B</i>           | <i>RPL26B CEN LEU2</i>                           | This work        |
| YCplac111-yeGFP                     | C-terminal yeGFP <i>CEN LEU2</i>                 | M. Hall          |
| YCplac-111- <i>RPL26A-eGFP</i>      | <i>RPL26A-eGFP CEN LEU2</i>                      | This work        |
| YCplac-111- <i>RPL26B-eGFP</i>      | <i>RPL26B-eGFP CEN LEU2</i>                      | This work        |
| pRS316- <i>RPL25-eGFP-NOP1-mRFP</i> | <i>RPL25-eGFP NOP1-mRFP CEN URA3</i>             | (13)             |
| pRS316- <i>RPS3-eGFP-NOP1-mRFP</i>  | <i>RPS3-eGFP NOP1-mRFP CEN URA3</i>              | (13)             |
| pRS316- <i>GAL-NMD3FL</i>           | <i>GAL::NMD3 CEN URA3</i>                        | (1)              |
| pRS316- <i>GAL-NMD3Δ100</i>         | <i>GAL::NMD3Δ100 CEN URA3</i>                    | (1)              |
| p0-LacZ                             | <i>PGK1::lacZ 2μ TRP1</i>                        | (4, 5)           |
| p1-LacZ                             | <i>PGK1::lacZ (-1 frameshift) 2μ TRP1</i>        | (4, 5)           |
| p+1-LacZ                            | <i>PG1K::lacZ (+1 frameshift) 2μ TRP1</i>        | (4, 5)           |
| pUK815                              | <i>PGK1::lacZ CEN URA3</i>                       | (12)             |
| pUK817                              | <i>PGK1::lacZ (premature TAA codon) CEN URA3</i> | (12)             |
| pUK818                              | <i>PGK1::lacZ (premature TAG codon) CEN URA3</i> | (12)             |
| pUK819                              | <i>PGK1::lacZ (premature TGA codon) CEN URA3</i> | (12)             |
| p367                                | <i>HIS4-lacZ (ATG start codon) URA3</i>          | (3)              |
| p391                                | <i>HIS4-lacZ (TGG start codon) URA3</i>          | (3)              |
| pBS1479                             | TAP tag fragment <i>CEN K. lactis-TRP1</i>       | (11)             |
| pFA6a-TRP1-PGAL1-3xHA               | GAL promoter 3xHA tag <i>CEN K.lactis-TRP1</i>   | (10)             |
| pFA6a-kanMX6                        | kanMX6                                           | (15)             |
| pFA6a-HIS3MX6                       | HIS3MX6                                          | (15)             |

**Table S3. Oligonucleotides used in this study**

| Name                                      | 5'-3' Sequence                   |
|-------------------------------------------|----------------------------------|
| L26A-LEFT                                 | AGTCGCCGAGTTTTGTCTTC             |
| L26A-RIGHT                                | GCTGACCTGACAAGTCGTTG             |
| L26B-LEFT                                 | CGGAGTAAAGACCTAGGCAAA            |
| L26B-RIGHT                                | AAACAAC TAGTGACAAGACGGAAG        |
| L26A-TAG                                  | CGGGATCCTTCCAATTACC              |
| L26B-TAG                                  | GCGTCGACTTCCAATTTACC             |
| RPL26B-LEFTpHT $\Delta$                   | CGGGATCCC GCGGAGTAAAGACCTAGGCAAA |
| RPL26A-RIGHTpHT $\Delta$                  | CGGGATCCC GCGCTGACCTGACAAGTCGTTG |
| RPL26A-LEFTpHT $\Delta$                   | CGGGATCCC GAGTCGCCGAGTTTTGTCTTC  |
| L26 Probe                                 | ACGTTTCCTCTGACAGAAGAAAGG         |
| RPL35AGAL-LEFT                            | GCGTCGACATGGTATGTTTGAGATG        |
| RPL35AGAL-RIGHT                           | GCGCATGCATTGAACTTTGCCAATA        |
| ADH1 UP                                   | GCACGGTGACTGGCCATT               |
| ADH1 LOW                                  | AGACTCTGTAACCCATAGCCTTGG         |
| Probe a (5'A <sub>0</sub> )               | GGTCTCTCTGCTGCCGG                |
| Probe b (18S)                             | CATGGCTTAATCTTTGAGAC             |
| Probe c (3-D/A <sub>2</sub> )             | GACTCTCCATCTCTTGCTTCTTG          |
| Probe d (A <sub>2</sub> /A <sub>3</sub> ) | TGTTACCTCTGGGCC                  |
| Probe e (5.8S)                            | TTTCGCTGCGTTCTTCATC              |
| Probe f (E/C <sub>2</sub> )               | GGCCAGCAATTTCAAGTTA              |
| Probe g (C <sub>1</sub> /C <sub>2</sub> ) | GAACATTGTTGCGCTAGA               |
| Probe h (25S)                             | CTCCGCTTATTGATATGC               |
| Probe 5S                                  | GGTCACCCACTACACTACTCGG           |
| 5.8S_3'END                                | AAATGACGCTCAAACAGGCATGC          |
| 25S_421                                   | CCATGTCTGATCAAATGCC              |
| 25S_330                                   | CTTGTTGCTATCGGTCTCTC             |
| 25S_233                                   | CTTTACAAAGAACCGCACTCC            |
| 25S_117                                   | GCACCGAAGGTACCAGATTTTC           |

**Table S4. Quantification of pre- and mature rRNAs in the *rp126* null strain**

| Pre- and mature rRNAs | Relative value <sup>a</sup> |
|-----------------------|-----------------------------|
| 35S                   | 2.2 ± 0.7                   |
| 32S                   | 2.4 ± 0.9                   |
| 27SA <sub>2</sub>     | 1.5 ± 0.5                   |
| 27SB                  | 1.6 ± 0.5                   |
| 25S                   | 1.1 ± 0.4                   |
| 20S                   | 0.9 ± 0.4                   |
| 18S                   | 1.2 ± 0.6                   |

<sup>a</sup>Pre- and mature rRNAs were detected by Northern blot hybridisation as shown in Fig. 7A. Signal intensities were measured by phosphoimager scanning. Values were normalised to those obtained for the wild-type control strain, arbitrarily set at 1.0. The mean and the standard error were calculated from three independent experiments.

**Table S5. Summary of the translation phenotypes of the *rpl26* null mutant**

| Assays                                      | Strain        |                          |                |
|---------------------------------------------|---------------|--------------------------|----------------|
|                                             | Wild-type     | <i>rpl26</i> null mutant |                |
| <b>Drug sensitivity<sup>a</sup></b>         |               |                          |                |
|                                             | Anisomycin    | No                       | No             |
|                                             | AZC           | No                       | No             |
|                                             | Cycloheximide | No                       | No             |
|                                             | Hygromycin B  | No                       | No             |
|                                             | Paramomycin   | No                       | No             |
|                                             | Neomycin      | No                       | No             |
| <b>Killer maintenance<sup>b</sup></b>       |               | K <sup>+</sup>           | K <sup>+</sup> |
| <b>Programmed frameshifting<sup>c</sup></b> |               |                          |                |
|                                             | -1 PRF        | 0.08 ± 0.03              | 0.08 ± 0.02    |
|                                             | +1 PRF        | 0.15 ± 0.03              | 0.15 ± 0.06    |
| <b>Readthrough activity<sup>d</sup></b>     |               |                          |                |
|                                             | UAA           | 0.04 ± 0.01              | 0.03 ± 0.01    |
|                                             | UAG           | 0.02 ± 0.01              | 0.02 ± 0.01    |
|                                             | UGA           | 0.16 ± 0.04              | 0.17 ± 0.06    |
| <b>Start codon selection<sup>e</sup></b>    |               | 0.08 ± 0.02              | 0.08 ± 0.02    |

<sup>a</sup>Effective concentrations of each drug are described in Materials and Methods; No: no effect.

<sup>b</sup>Killer phenotype was evaluated as described in Materials and Methods; K<sup>+</sup>: stable killer phenotype.

<sup>c</sup>PFR efficiencies were determined *in vivo* using LacZ reporters as described in Materials and Methods. The values correspond to the ratio of β-galactosidase activity produced by cells harbouring either p-1-LacZ or p+1-LacZ divided by the β-galactosidase activity produced by cell harbouring p0-LacZ. The mean and the standard error were calculated from at least three independent transformants of each plasmid in triplicate.

<sup>d</sup>Readthrough activities were determined *in vivo* using LacZ reporters as described in Materials and Methods. The values correspond to the ratio of β-galactosidase activity produced by cells harbouring either pUK817 (UAA), pUKC818 (UAG) or pUK819 (UGA) divided by the β-galactosidase activity produced by cell harbouring pUKC815 (no premature stop codon). The mean and the standard error were calculated from at least three independent transformants of each plasmid in triplicate.

<sup>e</sup>Start codon selection stringency was determined *in vivo* using LacZ reporters as described in Materials and Methods. The values correspond to the ratio of β-galactosidase activity produced by cells harbouring p391 (*HIS4<sup>UUG</sup>-lacZ*) divided by the β-galactosidase activity produced by cell harbouring p387 (*HIS4<sup>AUG</sup>-lacZ*). The mean and the standard error were calculated from at least three independent transformants of each plasmid in triplicate.

## LEGENDS TO THE SUPPLEMENTARY FIGURES

**Figure S1. Pre-rRNA processing in *S. cerevisiae*.** (A) Structure and processing sites of the 35S pre-rRNA. This precursor contains the sequences for the mature 18S, 5.8S and 25S rRNAs that are separated by two internal transcribed spacer sequences, ITS1 and ITS2, and flanked by two external transcribed spacer sequences, 5' ETS and 3' ETS. The mature rRNA species are shown as bars and the spacers as lines. The processing sites and the location of various probes used in this study are indicated. Probes are listed in Table S3. (B) Pre-rRNA processing pathway. Cleavage and trimming reactions are indicated. Note that pre-rRNA processing also occurs co-transcriptionally at site  $A_2$  (9) (not shown). For more details on yeast pre-rRNA processing, see (8, 14).

**Figure S2. L26 is conserved in the three domains of life.** Comparison of the amino acid sequences of eukaryotic L26A and L26B from *S. cerevisiae*, eubacterial L24 from *E. coli* and archaeal L29 from *Haloarcula marismortui*. Proteins were aligned using ClustalW2 at EMBL-EBI ([www.ebi.ac.uk/Tools/clustalw2/](http://www.ebi.ac.uk/Tools/clustalw2/)).

**Figure S3. L26 is not essential for growth.** The strains JWY6147 (Wild-type) and JWY9626 (*GAL::RPL26*), which is a *rp126b* $\Delta$  strain that harbours a *HA-RPL26A* allele under the control of a *GAL* promoter, were grown in liquid YPGal to an  $OD_{610}$  of 0.5. Serial dilutions were spotted on YPGal (Galactose) and YPD (Glucose) plates and incubated for several days at the indicated temperatures.

**Figure S4. Depletion of L26 partially perturbs production of 60S ribosomal subunits.** Polysome profiles are shown for the *GAL::RPL26* strain described in Fig. S3. Cells were grown to mid log phase in YPGal (Galactose) and shifted for 17 h to YPD (Glucose). Total extracts were prepared and ten  $A_{260}$  units of each sample were resolved on 7%-47% sucrose gradients. The  $A_{254}$  was continuously monitored. Sedimentation is from left to right. The peaks of free 40S and 60S r-subunits, 80S free couples/monosomes and polysomes are indicated. Half-mer polysomes are labelled by arrows.

**Figure S5. L26 depletion leads to a mild pre-rRNA processing defect.** Total RNA was extracted from the *GAL::RPL26* strain grown at 30°C in YPGal (Gal) or shifted for 17 h to YPD (Glc). Primer extension was performed with probe f within ITS2 (Table S3). This



probe allows the detection of 27SA<sub>2</sub>, 27SA<sub>3</sub> and 27SB<sub>L/S</sub> and 7S<sub>L/S</sub> pre-rRNAs as the stops at processing sites A<sub>2</sub>, A<sub>3</sub>, B<sub>1L</sub> and B<sub>1S</sub>, respectively.

**Figure S6. Analysis of ribosomes from wild-type and L26-deficient cells.** Ribosomal particles were enriched from wild-type and *rpl26* null (*rpl26a*Δ *rpl26b*Δ) cells as described in Materials and Methods. Then, they were analysed by SDS-PAGE and the presence of selected r-proteins in the preparations was analysed by western blotting using specific antibodies.

**Figure S7. *In vivo* chemical probing of the yeast rRNA domain I.** (A) Secondary structure of yeast 25S/5.8S rRNA domain I showing the location of the primers used for *in vivo* DMS chemical probing. (B) Wild-type and *rpl26* null (*rpl26a*Δ *rpl26b*Δ) cells were treated with DMS. Total RNA was extracted from unmodified (-DMS) and modified (+DMS) yeast cells and analysed by primer extension. Probes, between parentheses, are listed in Table S3. U, A, G, C represent dideoxy sequencing lanes done with the same primers. Stop controls indicate the efficiency of the quenching reaction after DMS treatment. Black and green dots denote nucleotides with stronger and weaker reactivity to DMS, respectively, in the *rpl26* null strain relative to that in the wild-type strain. For a three-dimensional view of the location within the ribosome of these nucleotides, see Fig. 10C.

## SUPPLEMENTARY REFERENCES

1. **Belk JP, He F, Jacobson A.** 1999. Overexpression of truncated Nmd3p inhibits protein synthesis in yeast. *RNA* **5**:1055-1070.
2. **Brachmann CB, Davies A, Cost GJ, Caputo E, Li J, Hieter P, Boeke JD.** 1998. Designer deletion strains derived from *Saccharomyces cerevisiae* S288C: a useful set of strains and plasmids for PCR-mediated gene disruption and other applications. *Yeast* **14**:115-132.
3. **Cigan AM, Pabich EK, Donahue TF.** 1988. Mutational analysis of the *HIS4* translational initiator region in *Saccharomyces cerevisiae*. *Mol. Cell. Biol.* **8**:2964-2975.
4. **Dinman JD, Icho T, Wickner RB.** 1991. A -1 ribosomal frameshift in a double-stranded RNA virus of yeast forms a gag-pol fusion protein. *Proc. Natl. Acad. Sci. USA* **88**:174-178.
5. **Dinman JD, Wickner RB.** 1992. Ribosomal frameshifting efficiency and gag/gag-pol ratio are critical for yeast M1 double-stranded RNA virus propagation. *J. Virol.* **66**:3669-3676.
6. **Gietz D, St. Jean A, Woods RA, Schiestl RH.** 1992. Improved method for high efficiency transformation of intact yeast cells. *Nucleic Acids Res.* **20**:1425.
7. **Gietz RD, Sugino A.** 1988. New yeast-*Escherichia coli* shuttle vectors constructed with in vitro mutagenized yeast genes lacking six-base pair restriction sites. *Gene* **74**:527-534.
8. **Henras AK, Soudet J, Gerus M, Lebaron S, Caizergues-Ferrer M, Mouglin A, Henry Y.** 2008. The post-transcriptional steps of eukaryotic ribosome biogenesis. *Cell. Mol. Life Sci.* **65**:2334-2359.
9. **Kos M, Tollervey D.** 2010. Yeast pre-rRNA processing and modification occur cotranscriptionally. *Mol. Cell* **37**:809-820.
10. **Longtine MS, McKenzie A, 3rd, Demarini DJ, Shah NG, Wach A, Brachat A, Philippsen P, Pringle JR.** 1998. Additional modules for versatile and economical PCR-based gene deletion and modification in *Saccharomyces cerevisiae*. *Yeast* **14**:953-961.
11. **Rigaut G, Shevchenko A, Rutz B, Wilm M, Mann M, Séraphin B.** 1999. A generic protein purification method for protein complex characterization and proteome exploration. *Nature Biotechnol.* **17**:1030-1032.

12. **Tuite MF, Stansfield I, Eurwilaichitr L, Akhmaloka.** 1993. Novel ribosome-associated translation factors are required to maintain the fidelity of translation in yeast. *Biochem. Soc. Trans.* **21**:857-862.
13. **Ulbrich C, Diepholz M, Bassler J, Kressler D, Pertschy B, Galani K, Bottcher B, Hurt E.** 2009. Mechanochemical removal of ribosome biogenesis factors from nascent 60S ribosomal subunits. *Cell* **138**:911-922.
14. **Venema J, Tollervey D.** 1999. Ribosome synthesis in *Saccharomyces cerevisiae*. *Annu. Rev. Genet.* **33**:261-311.
15. **Wach A, Brachat A, Alberti-Segui C, Rebischung C, Philippsen P.** 1997. Heterologous *HIS3* marker and GFP reporter modules for PCR-targeting in *Saccharomyces cerevisiae*. *Yeast* **13**:1065-1075.

SUPPLEMENTARY FIGURES

**A**

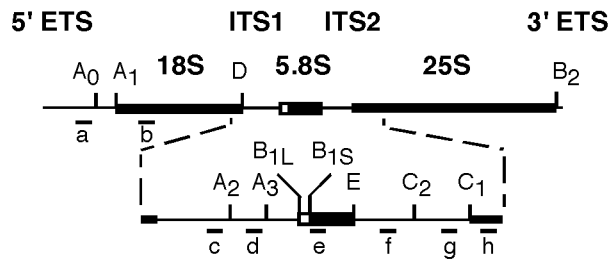

**B**

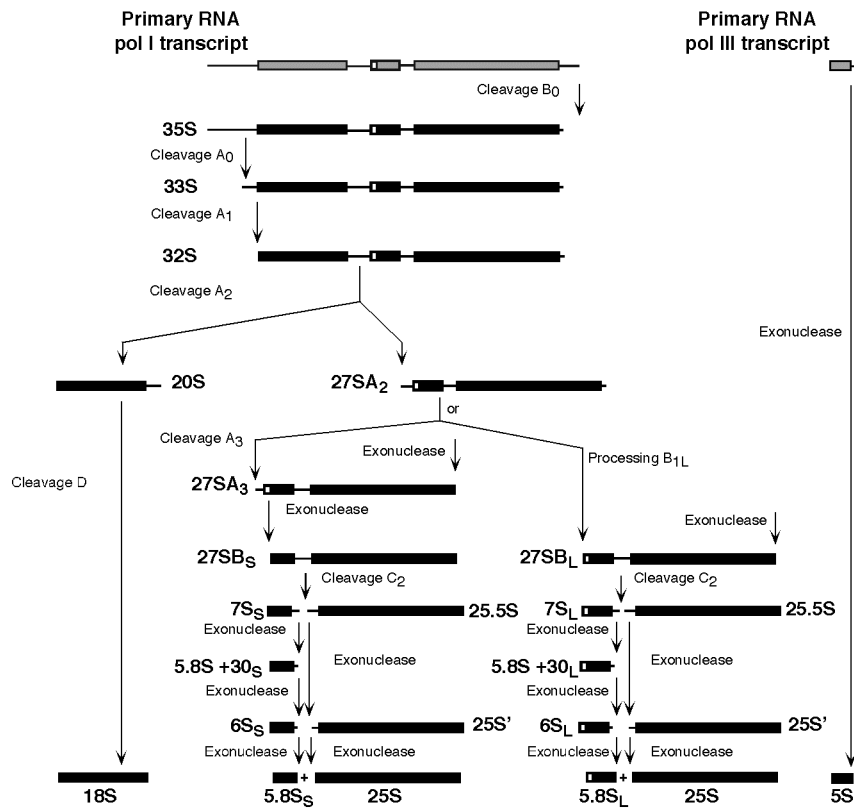

Figure S1

```

S. cerevisiae L26A  MAKQSLDVSSDRRKARKAYFTAPSSQRRVLLSAPLSKELRAQYGIKALPIRRDDEVLVVR 60
S. cerevisiae L26B  MAKQSLDVSSDRRKARKAYFTAPSSERRVLLSAPLSKELRAQYGIKALPIRRDDEVLVVR 60
H. marismortui L24  -----MSKQPKQKRSQRRAPLHERHKQVRATLSADLREEYGQRNVRVNAGDTVEVLR 53
E. coli L24         -----MAAKIRRDDEVIVLTGKDKGKRGKVKNVLSSGKVIVEGIN-LVKKHQKVPVPA 53
                        :. . . . : : ** * . : . * ..

S. cerevisiae L26A  GSKKGQEGKISSVYRLKFAVQVDKVTKEKVNASVPINLHPSKLVITKLHLDKDRKALIQ 120
S. cerevisiae L26B  GSKKGQEGKISSVYRLKFAVQVDKVTKEKVNASVPINLHPSKLVITKLHLDKDRKALIQ 120
H. marismortui L24  GDFAGEEGEVINVDLKDVAIHVEDVTLEKTDGEEVPRPLDTSNVRVTDLDLEDEKREARL 113
E. coli L24       -----QPG---GIVEKEAAIQVSNVAIFNAATGKADR-----VGFRFEDGKKVRRFF 96
                        : * .: : ::*..*: :. .. . : :. :

```

**S. cerevisiae L26A** RKGGKLE- 127  
**S. cerevisiae L26B** RKGGKLE- 127  
**H. marismortui L24** ESEDDSA- 120  
**E. coli L24** KSNSETIK 104  
 .. ..

Figure S2

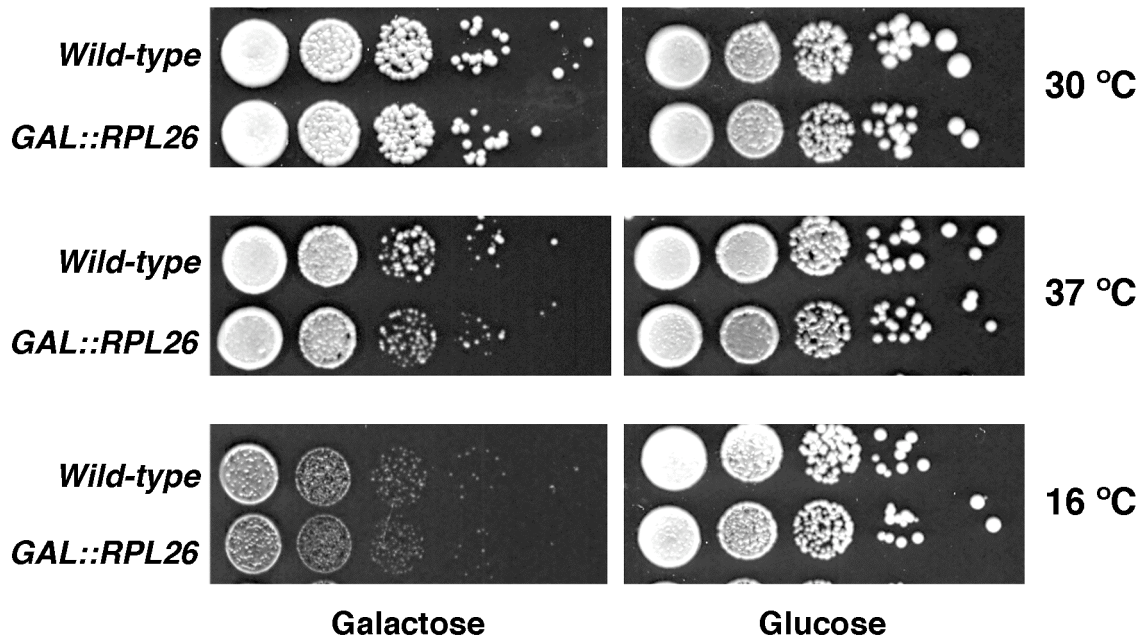

Figure S3

***GAL::RPL26***  
**Galactose**

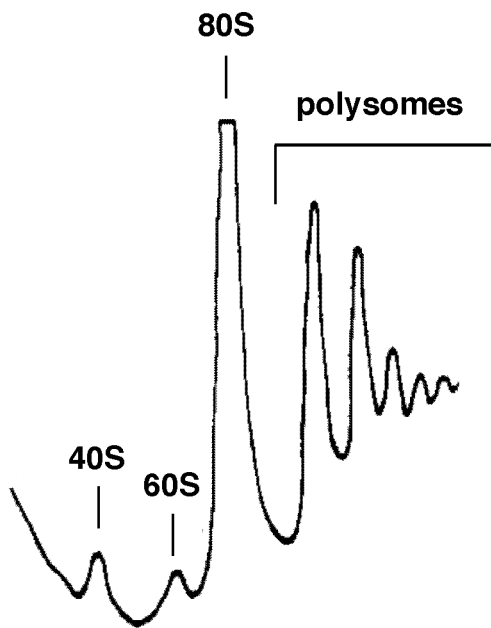

***GAL::RPL26***  
**Glucose**

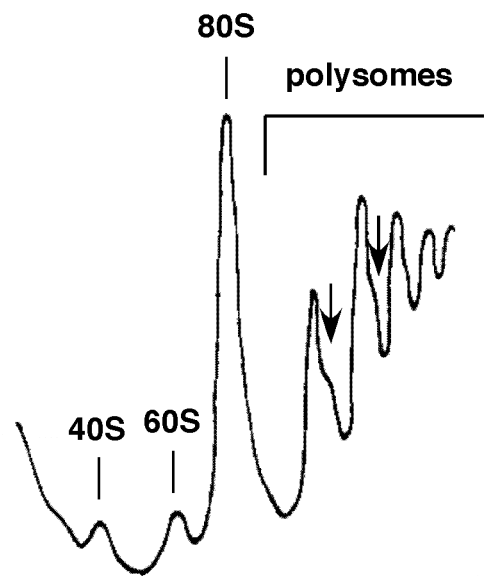

**Figure S4**

**GAL::RPL26**

**Gal Glc**

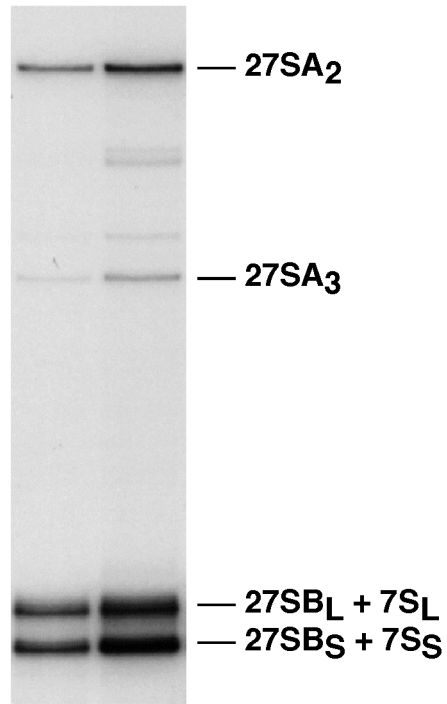

(f)

**Figure S5**



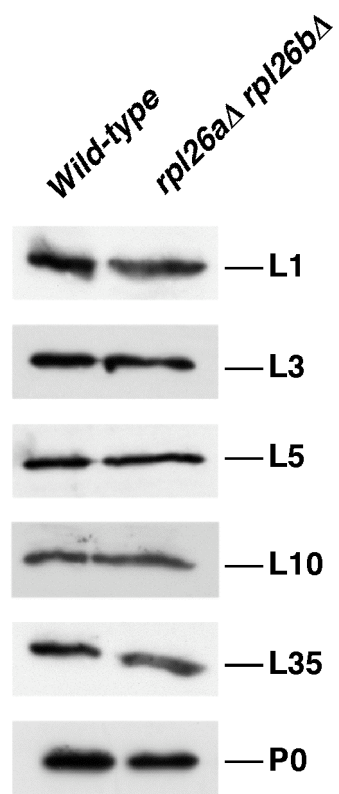

Figure S6

**A**

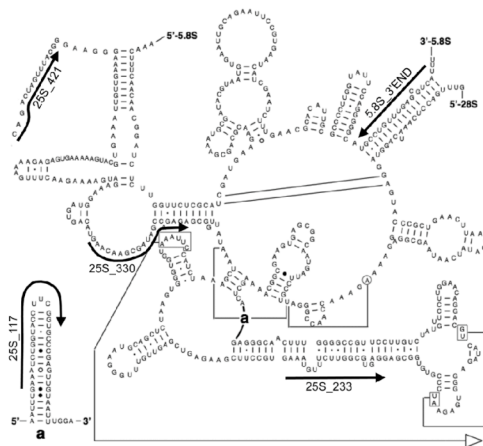

**B**

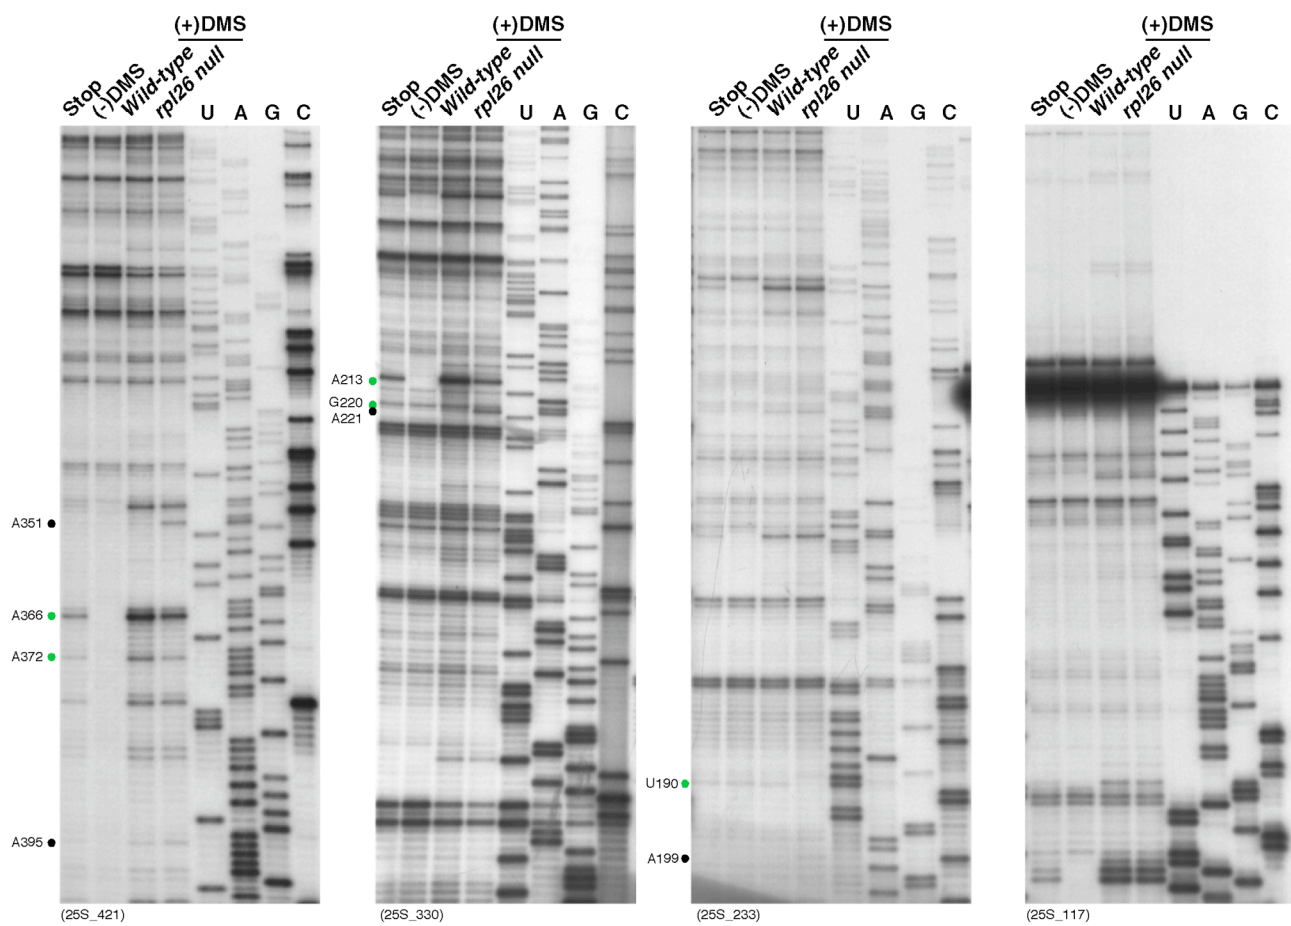

**Figure S7**
